# Supplementary material for: The interaction between the outer layer of a mixed ion pair amphiphile/double-chained cationic surfactant vesicle and DNA: a Langmuir monolayer study
Source: Royal Society of Chemistry journal article supplement (doi:10.1039/c3sm52276h), 2013-12-10
Supplement: c3sm52276h.pdf [file c3sm52276h.pdf]

Interaction between the outer layer of mixed ion pair  
amphiphile/double-chained cationic surfactant vesicle  
and DNA: a Langmuir monolayer study

Jung Lee and Chien-Hsiang Chang\*

Department of Chemical Engineering,  
National Cheng Kung University,  
Tainan 701, Taiwan

\* Corresponding author. Tel: (+) 886-6-2757575 ext. 62671. Fax: (+)  
886-6-2344496. Email: changch@mail.ncku.edu.tw

## Supplementary Information

### Surface activity of DNA

Table S1 lists the reflectivity of the BAM images obtained at air/liquid interfaces with subphases of  $10^{-9}$  and  $10^{-7}$  M DNA aqueous solutions in the absence of a Langmuir monolayer. The increased reflectivity of BAM images on a  $10^{-7}$  M DNA aqueous subphase was detected during the interface compression. The enhanced reflectivity suggested an increased surface concentration of molecules and/or highly ordered conformation of the molecules at the interface. Thus, the surface activity of DNA can not be totally ignored.

### The areas per molecule and areas per alkyl chain of a HTMA-DS Langmuir monolayer

Table S2 shows that the area per alkyl chain of the molecules in the HTMA-DS monolayer at high surface pressures is smaller than that in a closely packed monolayer, which is about  $20 \text{ \AA}^2$ .

Table S1. The values of the trough area and reflectivity of BAM images of at air/liquid interfaces with subphases of  $10^{-7}$  M and  $10^{-9}$  M DNA aqueous solution.

| DNA (M)   | Relative Area (%) | Reflectivity (gray level, au) |
|-----------|-------------------|-------------------------------|
| $10^{-7}$ | 100               | 19                            |
|           | 24*               | 26                            |
| $10^{-9}$ | 100               | 19                            |
|           | 24*               | 19                            |

\*The smallest relative area was 24 %.

Table S2. The areas per molecule and areas per alkyl chain of the molecules in a HTMA-DS Langmuir monolayer at surface pressures of 40 and 45 mN/m with subphases of pure water and  $10^{-9}$  M DNA aqueous solution.

| Subphase                         | Surface pressure (mN/m) | Area per molecule ( $\text{\AA}^2$ ) | Area per alkyl chain ( $\text{\AA}^2$ ) |
|----------------------------------|-------------------------|--------------------------------------|-----------------------------------------|
| Pure water                       | 40                      | 42                                   | 21                                      |
|                                  | 45                      | 41                                   | 20.5                                    |
| $10^{-9}$ M DNA aqueous solution | 40                      | 35                                   | 17.5                                    |
|                                  | 45                      | 32                                   | 16                                      |
